# Supplementary material for: Panicle Apical Abortion 3 Controls Panicle Development and Seed Size in Rice
Source: PubMed Central journal article supplement (PMC8282854; doi:10.1186/s12284-021-00509-5), 2021-07-15

**Supplemental Table 2 All primers for this study**

| Primer Name                  | Sequence(5'-3')                                    | Purpose                             |
|------------------------------|----------------------------------------------------|-------------------------------------|
| ZTQ38F                       | TGCGAATGCTTGAATGGATC                               | Fine mapping of the PAA3 gene       |
| ZTQ38R                       | CAAGGCTCACTTCTAGATCAAG                             |                                     |
| CHR4-P118-3F                 | GGTAGCATCCATTTGCCGA                                |                                     |
| CHR4-P118-3R                 | GTGACGGCTCGAACATCTG                                |                                     |
| CHR4-P118-6F                 | CGGATTGAACTGTCCATGTTAAC                            |                                     |
| CHR4-P118-6R                 | CCTTACAATGATGAATGGTC                               |                                     |
| CHR4-P118-9F                 | GATATGATATGATCGAGCCGCTCG                           |                                     |
| CHR4-P118-9R                 | CTGATGCAGCTTACATTGCTGG                             |                                     |
| PAA3 -com-F(EcoR1)           | ATGACCATGATTACGAATTCTGAGG<br>TCATCCAATCAGACGCTGAC  |                                     |
| PAA3 -com-R(HindIII)         | CGACGGCCAGTGCCAAGCTTCCATG<br>CCGAGTGCAATGCTACT     |                                     |
| comF1                        | CACTATTACAATTCTAGCAACGACC                          | Identification of transgenic plants |
| GUSR1                        | CTGCCTGGCACAGCAATTG                                |                                     |
| comF2                        | CAAATTCGGTGTGATCAATC                               |                                     |
| comR2                        | GCCAGCGTACTGTATTGCGCTC                             |                                     |
| PAA3 P-GUS-F( <i>EcoRI</i> ) | ATGACCATGATTACGAATTCTGAGG<br>TCATCCAATCAGACGCTGAC  | Expression pattern analysis         |
| PAA3 P-GUS-R( <i>NcoI</i> )  | TACCCTCAGATCTACCATGGCGGTG<br>GTGGTATTAGTAGTGGAGAGG |                                     |
| SL- PAA3 -F ( <i>SpeI</i> )  | GACAGCCCAGATCAACTAGTATGGG<br>TGGGCTCGAGGAGAT       | Subcellular localization            |
| SL- PAA3 -R ( <i>SmaI</i> )  | CTCACCATGGATCCCCGGGCACTG<br>TGTAGTTCTGCTGGATCG     |                                     |
| YC- PAA3-F ( <i>BamHI</i> )  | GAGCTCGGTACCCGGGATCCATGG<br>GTGGGCTCGAGGAGATCA     |                                     |
| YC- PAA3-R ( <i>XbaI</i> )   | TTGCTCACCATGTCGACTCTAGACA<br>CTGTGTAGTTCTGCTGGAT   |                                     |
| q-PAA3 F                     | CAAGGACGCTTCACTTGAGGC                              | For qRT-PCR                         |
| q-PAA3 R                     | GCAATACCAATGTGCGCCTTC                              |                                     |
| q-OsVPE2 F                   | CGGCTCCAACGGCTACTACAAC                             |                                     |
| q-OsVPE2R                    | TCGGGACCCCAGCATAGACA                               |                                     |
| q-OsVPE3 F                   | CGGTAACCTACAGGCACCAGGC                             |                                     |
| q-OsVPE3 R                   | GTGACTTCGTCTCCAGTGTAATCC                           |                                     |
| q-CATA F                     | CCACCGATTACCGCCACA                                 |                                     |
| q-CATA R                     | GCCTCGTCGTCCATCAAGC                                |                                     |
| q-CATB F                     | ATCCCACGCAACTACAGG                                 |                                     |
| q-CATB R                     | CAAGGTGAGGCTTTCCAT                                 |                                     |
| q-CATC F                     | CCGCTTCTCCACCGTCAT                                 |                                     |
| q-CATC R                     | ACCAGGTCCCAGTTGCCC                                 |                                     |
| q-ACTIN F                    | TGGCATCTCTCAGCACATTCC                              |                                     |
| q-ACTIN R                    | TGCACAATGGATGGGTCAGA                               |                                     |
| qLOC_Os04g10160 F            | GGTTCATCGACGCCATGAC                                |                                     |
| qLOC_Os04g10160 R            | GCCCTGATCTCTGATCCTGA                               |                                     |
| qLOC_Os01g43750 F            | CGAAGGCGAGAAGTGGGTC                                |                                     |
| qLOC_Os01g43750 R            | GAACCAAGGGACTCCATCCAC                              |                                     |
| qLOC_Os11g29290 F            | CCGTGATGGGGCTCATCC                                 |                                     |
| qLOC_Os11g29290 R            | GTACCCGCATTTCGATCATC                               |                                     |
| qLOC_Os02g36030 F            | GTGCTCAACCTCGTCTCCAGC                              |                                     |
| qLOC_Os02g36030 R            | CGACGAGGTCTCCACGAG                                 |                                     |
| q-LOC_Os04g59190F            | GCGCTCCAGCGTGAGATC                                 |                                     |
| q-LOC_Os04g59190R            | CGCCACTCAAGTAAACCGA                                |                                     |

|                   |                       |
|-------------------|-----------------------|
| q-LOC_Os04g59150F | CTGAAGCTCATCGAGGACATC |
| q-LOC_Os04g59150R | GAGGCACGTCGAAGTAGGG   |
| q-LOC_Os01g73200F | CCAGTTTCGCGTCTGAGG    |
| q-LOC_Os01g73200R | GCGTCGAGCTTGAGCTTG    |
| q-LOC_Os04g59260F | GTGCAAGCCGCTCTCCAG    |
| q-LOC_Os04g59260R | CTGCTCCGAGTTGCTGCCTC  |

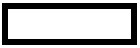

Supplement: 12284_2021_509_MOESM7_ESM.pdf [file 12284_2021_509_MOESM7_ESM.pdf]
