# Supplementary material for: Panicle Apical Abortion 3 Controls Panicle Development and Seed Size in Rice
Source: PubMed Central journal article supplement (PMC8282854; doi:10.1186/s12284-021-00509-5), 2021-07-15
Supplement: 12284_2021_509_MOESM1_ESM.pdf [file 12284_2021_509_MOESM1_ESM.pdf]

## Supplemental Figure 1

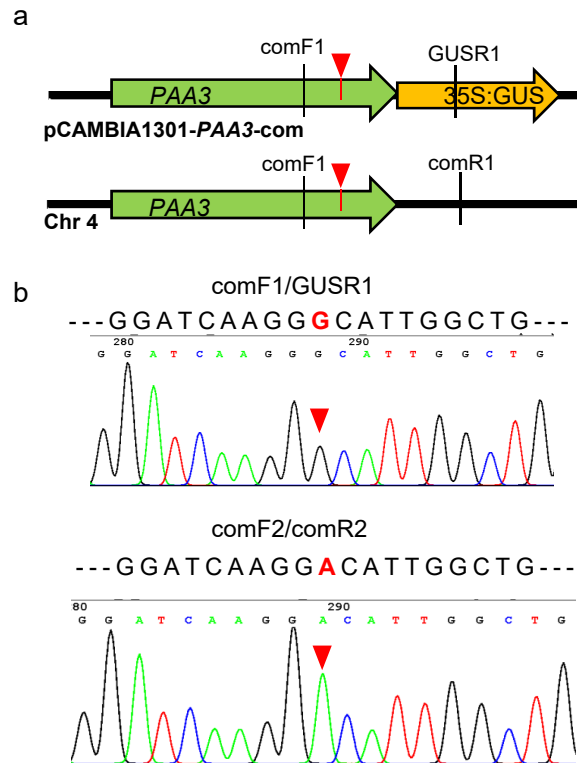

**Fig. S1, Identification of transgenic plants.** a, Two pairs of primers for amplification to detect the 15 transformants (comF1-GUSR1 for exogenous vector; comF2-comR2 for endogenous sites). b, Comparison diagram of sequence.
