# Supplementary material for: Panicle Apical Abortion 3 Controls Panicle Development and Seed Size in Rice
Source: PubMed Central journal article supplement (PMC8282854; doi:10.1186/s12284-021-00509-5), 2021-07-15
Supplement: 12284_2021_509_MOESM2_ESM.pdf [file 12284_2021_509_MOESM2_ESM.pdf]

## Supplemental Figure 2

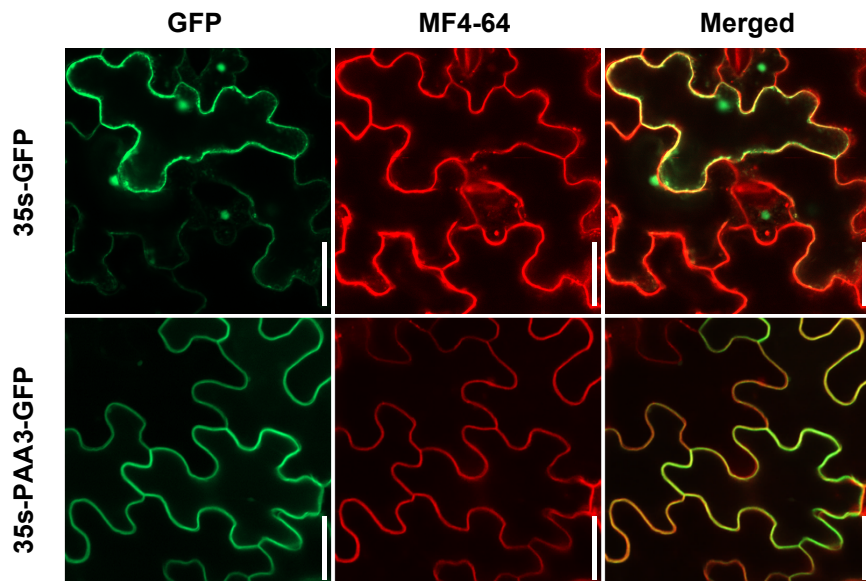

**Fig. S2 Transient expression in *Nicotiana benthamiana* leaves.** Upper row indicates the expression of GFP protein without PAA3 in *N benthamiana* leaves as the negative control. Lower row indicates the plasma membrane localization of the PAA3 protein in *N benthamiana* leaves given by the expression of PAA3 fused with GFP. Green is GFP signal. The plasma membrane as labelled by MF4-64. Red is the chloroplast signal. Bars: 20 $\mu$ m
