# Supplementary material for: Panicle Apical Abortion 3 Controls Panicle Development and Seed Size in Rice
Source: PubMed Central journal article supplement (PMC8282854; doi:10.1186/s12284-021-00509-5), 2021-07-15
Supplement: 12284_2021_509_MOESM4_ESM.pdf [file 12284_2021_509_MOESM4_ESM.pdf]

## Supplemental Figure 4

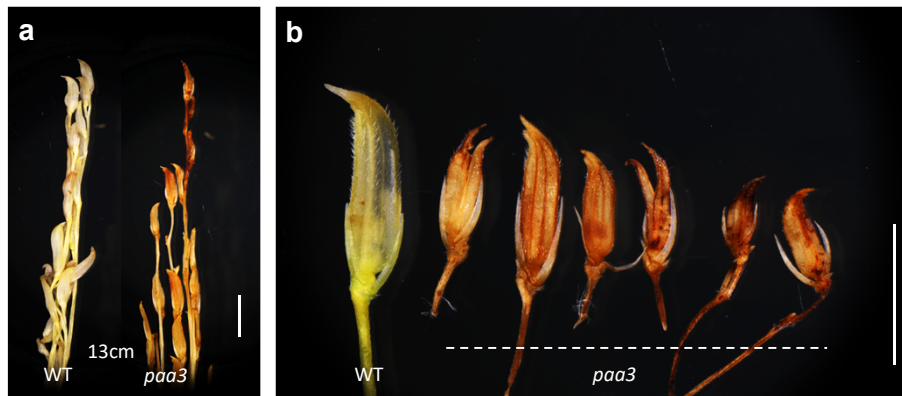

**Fig. S4 DAB staining analysis.** a, Top panicle of *paa3* mutants and WT. (panicle length=13 cm). b, Top spikelet of *paa3* mutants and WT. Bars: (a, b) 5mm
