# Supplementary material for: Panicle Apical Abortion 3 Controls Panicle Development and Seed Size in Rice
Source: PubMed Central journal article supplement (PMC8282854; doi:10.1186/s12284-021-00509-5), 2021-07-15
Supplement: 12284_2021_509_MOESM5_ESM.pdf [file 12284_2021_509_MOESM5_ESM.pdf]

## Supplemental Figure 5

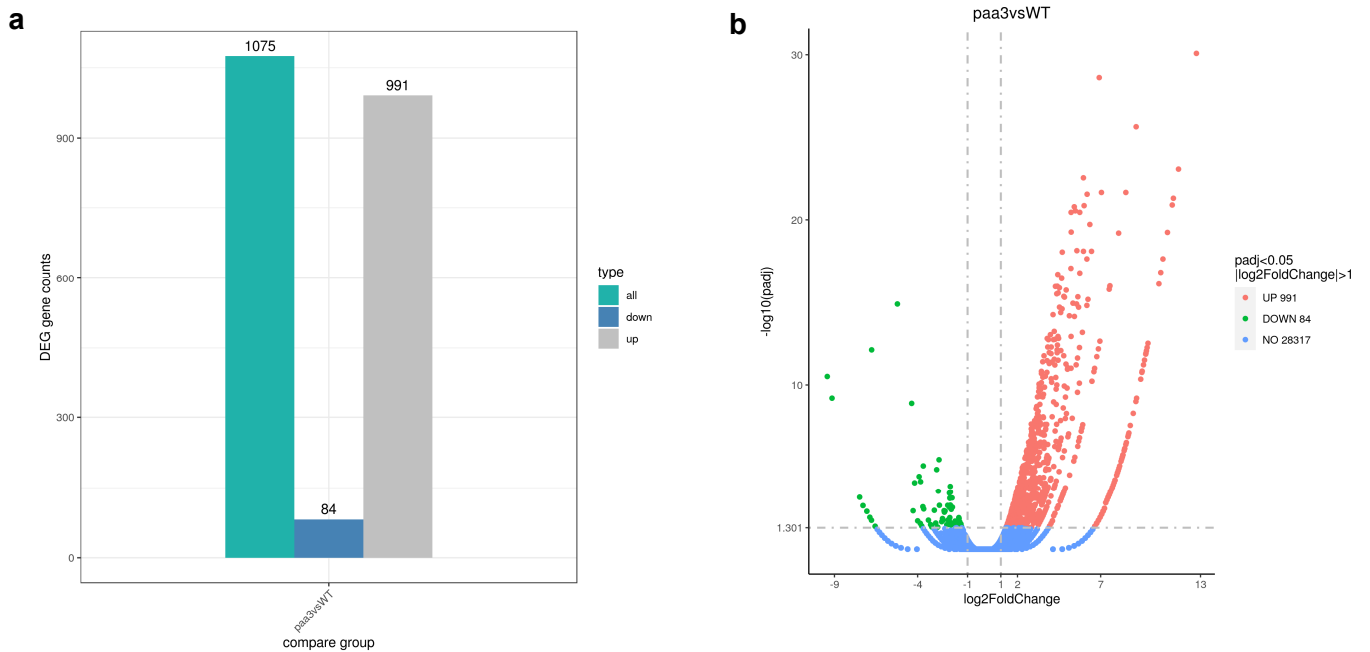

**Fig. S5, transcriptome analysis of *paa3*.** **a**, Showed that there were 1075 differential genes in WT and *paa3* samples, among which 991 genes were up-regulated and 84 genes were down-regulated. **b** The volcano figure showed an overall overview, including 28,317 genes with no change in expression, 991 up-regulated genes and 84 down-regulated genes.
