# Supplementary material for: Panicle Apical Abortion 3 Controls Panicle Development and Seed Size in Rice
Source: PubMed Central journal article supplement (PMC8282854; doi:10.1186/s12284-021-00509-5), 2021-07-15
Supplement: 12284_2021_509_MOESM6_ESM.pdf [file 12284_2021_509_MOESM6_ESM.pdf]

**Supplemental Table 1 Total frequency of spikelet abortion of *paa3* mutant**

| Sample       | Number of spikelets per panicle | Number of seeds per panicle | Abortion rate | Average abortion rate | SD    | Sample          | Number of spikelets per panicle | Number of seeds per panicle | Abortion rate | Average abortion rate | SD    |
|--------------|---------------------------------|-----------------------------|---------------|-----------------------|-------|-----------------|---------------------------------|-----------------------------|---------------|-----------------------|-------|
| <b>1B-1</b>  | 206                             | 204                         | 0.97%         | 1.25%                 | 1.00% | <i>paa3</i> -1  | 213                             | 172                         | 19.25%        | 18.25%                | 4.97% |
| <b>1B-2</b>  | 229                             | 225                         | 1.75%         |                       |       | <i>paa3</i> -2  | 203                             | 176                         | 13.30%        |                       |       |
| <b>1B-3</b>  | 211                             | 209                         | 0.95%         |                       |       | <i>paa3</i> -3  | 202                             | 164                         | 18.81%        |                       |       |
| <b>1B-4</b>  | 205                             | 203                         | 0.98%         |                       |       | <i>paa3</i> -4  | 230                             | 183                         | 20.43%        |                       |       |
| <b>1B-5</b>  | 197                             | 194                         | 1.52%         |                       |       | <i>paa3</i> -5  | 242                             | 165                         | 31.82%        |                       |       |
| <b>1B-6</b>  | 200                             | 199                         | 0.50%         |                       |       | <i>paa3</i> -6  | 156                             | 130                         | 16.67%        |                       |       |
| <b>1B-7</b>  | 210                             | 210                         | 0.00%         |                       |       | <i>paa3</i> -7  | 226                             | 191                         | 15.49%        |                       |       |
| <b>1B-8</b>  | 209                             | 201                         | 3.83%         |                       |       | <i>paa3</i> -8  | 238                             | 201                         | 15.55%        |                       |       |
| <b>1B-9</b>  | 196                             | 193                         | 1.53%         |                       |       | <i>paa3</i> -9  | 226                             | 190                         | 15.93%        |                       |       |
| <b>1B-10</b> | 229                             | 228                         | 0.44%         |                       |       | <i>paa3</i> -10 | 184                             | 156                         | 15.22%        |                       |       |
